# Supplementary material
Source: PubMed Central journal article supplement (PMC4001122)
Supplement: NIHMS557498-supplement-1.pdf [file NIHMS557498-supplement-1.pdf]

## Supplementary Material – Salloum et al.

**Supplementary Figure 1** Ras-driven cancer cells are uniquely dependent on exogenous fatty acids. MDA-MB-231, Calu-1, HCT116, HT29, T24, Panc1, BxPC3, MCF7 and BJ cells were plated and shifted to media conditions as indicated and cell number was determined 5 days later as in Fig. 2. Each measurement was normalized against relative cell number in 10% FBS, which was given a value of 100%. Error bars represent S.D. for at least two independent experiments.

**Table S1** Composition of fatty acid mixture

| Component                        |      | Concentration (mg/L) |
|----------------------------------|------|----------------------|
| Arachidonic acid                 | 20:4 | 2                    |
| Cholesterol                      |      | 220                  |
| DL- $\alpha$ -Tocophenol Acetate |      | 70                   |
| Linoleic Acid                    | 18:2 | 10                   |
| Linolenic Acid                   | 18:3 | 10                   |
| Myristic Acid                    | 14:0 | 10                   |
| Oleic Acid                       | 18:1 | 10                   |
| Palmitic Acid                    | 16:0 | 10                   |
| Puronic F-68                     |      | 90000                |
| Stearic Acid                     | 18:0 | 10                   |
| Tween 80 ®                       |      | 2200                 |

Composition of fatty acid mixture used in this study. Concentration is shown along with chain length and number of double bonds. The fatty acid mix was obtained from Invitrogen (11905).

**Table S2 Cell Cycle Distribution of Cells Treated with Rapamycin and EIPA**

| <b>MDA-MB-231</b>       | <b>sub-G1</b> | <b>G1</b>   | <b>S</b>   | <b>G2/M</b> |
|-------------------------|---------------|-------------|------------|-------------|
| ctrl                    | 5.53±1.23     | 64.11±0.65  | 16.62±0.3  | 13.73±1.64  |
| EIPA [10µM]             | 9.84±1.01     | 62.47±1.02  | 15.71±0.65 | 11.96±1.38  |
| Rapa [20µM]             | 10.21±1.05    | 61.25±1.09  | 15.62±0.97 | 12.91±1.17  |
| EIPA [10µM]/Rapa [20µM] | 59.92±12.69   | 32.19±11.54 | 4.83±0.59  | 3.05±0.56   |
| <b>BJ</b>               | <b>sub-G1</b> | <b>G1</b>   | <b>S</b>   | <b>G2/M</b> |
| ctrl                    | 1.25±0.6      | 68.57±1.59  | 16.96±0.21 | 13.23±2.4   |
| EIPA [10µM]             | 1.35±0.46     | 75.17±1.17  | 9.86±1.26  | 13.62±0.54  |
| Rapa [20µM]             | 1.29±0.33     | 84.78±0.38  | 6.49±0.66  | 7.43±0.61   |
| EIPA [10µM]/Rapa [20µM] | 1.91±0.44     | 80.21±2.91  | 11.31±3.71 | 6.57±1.23   |

Percentage of MDA-MB-231 and BJ cells with DNA content for the various cell cycle phases was determined by flow cytometry as described in Fig. 5C.
